# Supplementary material
Source: publisher figshare collection journal article supplement (https://frontiersin.figshare.com/ndownloader/files/13684397)
Supplement: Supplementary file 1 [file 13684397]

Supplementary Material

Soil C storage potential of exogenous organic matter at regional level (Italy) simulated by RothC model modified for amended soils

Claudio Mondini*, Maria Luz Cayuela, Tania Sinicco, Flavio Fornasier, Antonia Galvez, Miguel Angel Sánchez-Monedero

*** Correspondence:** Claudio Mondini: claudio.mondinil@crea.gov.it

**Table S1**. RothC EOM pool parameters sensitivity analysis for meat and bone meal amended soil

| **Parameter varied** | **fDEOM** | **fREOM** | **fDEOM / fREOM** | **KDEOM (y-1)** | **KREOM (y-1)** | **SOC (after 100 y) (t C ha-1)** | **SOC-EQ (t C ha-1)** | **C sequestration potential (t C ha-1 y-1)** | **SI** |
| --- | --- | --- | --- | --- | --- | --- | --- | --- | --- |
| **fDEOM/fREOM** | 0.90 | 0.10 | 9.00 | 27.3 | 0.36 | 42.28 | 5.28 | 0.053 | -120.7 |
| 0.80 | 0.20 | 4.00 | 27.3 | 0.36 | 42.58 | 5.58 | 0.056 | -60.4 |
| 0.70 | 0.30 | 2.33 | 27.3 | 0.36 | 42.88 | 5.88 | 0.059 | -40.4 |
| 0.60 | 0.40 | 1.50 | 27.3 | 0.36 | 43.17 | 6.17 | 0.062 | -30.3 |
| 0.50 | 0.50 | 1.00 | 27.3 | 0.36 | 43.47 | 6.47 | 0.065 | -24.4 |
| 0.40 | 0.60 | 0.67 | 27.3 | 0.36 | 43.77 | 6.77 | 0.068 | -20.5 |
| 0.30 | 0.70 | 0.43 | 27.3 | 0.36 | 44.07 | 7.07 | 0.071 | -18.0 |
| **0.21** | **0.79** | **0.26** | **27.3** | **0.36** | **44.34** | **7.34** | **0.073** |  |
| 0.10 | 0.90 | 0.11 | 27.3 | 0.36 | 44.67 | 7.67 | 0.077 | -12.7 |
| 0.01 | 0.99 | 0.01 | 27.3 | 0.36 | 44.93 | 7.93 | 0.079 | -11.8 |
| **KDEOM** | 0.21 | 0.79 | 0.26 | 1 | 0.36 | 44.53 | 7.53 | 0.0753 | -37 |
| 0.21 | 0.79 | 0.26 | 3 | 0.36 | 44.39 | 7.39 | 0.0739 | -138 |
| 0.21 | 0.79 | 0.26 | 5 | 0.36 | 44.35 | 7.35 | 0.0735 | -530 |
| 0.21 | 0.79 | 0.26 | 10 | 0.36 | 44.34 | 7.34 | 0.0734 | -1937 |
| 0.21 | 0.79 | 0.26 | 15 | 0.36 | 44.34 | 7.34 | 0.0734 | -3005 |
| 0.00 | 0.39 | 0.00 | 20 | 0.36 | 44.34 | 7.34 | 0.0734 | -3924 |
| **0.21** | **0.79** | **0.26** | **27.3** | **0.36** | **44.34** | **7.34** | **0.0734** |  |
| 0.21 | 0.79 | 0.26 | 40 | 0.36 | 44.34 | 7.34 | 0.0734 | -8532 |
| 0.21 | 0.79 | 0.26 | 50 | 0.36 | 44.34 | 7.34 | 0.0734 | -12201 |
| 0.21 | 0.79 | 0.26 | 60 | 0.36 | 44.34 | 7.34 | 0.0734 | -17576 |
| 0.21 | 0.79 | 0.26 | 70 | 0.36 | 44.34 | 7.34 | 0.0734 | -19126 |
| **KREOM** | 0.21 | 0.79 | 0.26 | 27.30 | 0.15 | 47.94 | 10.94 | 0.109 | -1 |
| 0.21 | 0.79 | 0.26 | 27.30 | 0.20 | 46.40 | 9.40 | 0.094 | -2 |
| 0.21 | 0.79 | 0.26 | 27.30 | 0.25 | 45.47 | 8.47 | 0.085 | -2 |
| 0.21 | 0.79 | 0.26 | 27.30 | 0.30 | 44.85 | 7.85 | 0.079 | -2 |
| **0.21** | **0.79** | **0.26** | **27.30** | **0.36** | **44.34** | **7.34** | **0.073** |  |
| 0.21 | 0.79 | 0.26 | 27.30 | 0.40 | 44.08 | 7.08 | 0.071 | -4 |
| 0.21 | 0.79 | 0.26 | 27.30 | 0.50 | 43.62 | 6.62 | 0.066 | -4 |
| 0.21 | 0.79 | 0.26 | 27.30 | 0.75 | 43.00 | 6.00 | 0.060 | -6 |
| 0.21 | 0.79 | 0.26 | 27.30 | 1.00 | 42.69 | 5.69 | 0.057 | -8 |
| 0.21 | 0.79 | 0.26 | 27.30 | 1.25 | 42.51 | 5.51 | 0.055 | -10 |
| 0.21 | 0.79 | 0.26 | 27.30 | 1.50 | 42.39 | 5.39 | 0.054 | -12 |
| 0.21 | 0.79 | 0.26 | 27.30 | 2.00 | 42.25 | 5.25 | 0.052 | -16 |
| 0.21 | 0.79 | 0.26 | 27.30 | 3.00 | 42.11 | 5.11 | 0.051 | -25 |

EOM: exogenous organic matter; f: partitioning factor; K: decomposition constant; DEOM: decomposable EOM; REOM: resistant EOM.

EQ: SOC at equilibrium = 36.9996 t ha-1; SOC - EQ: SOC after 100 years - SOC at equilibrium.

SI (sensitivity index): % change in output variable / % change in input variable.

Simulation scenario: 100 years of EOM addition at 1 t C ha-1 y-1.

Values in bold refer to simulation performed with initial values of the parameters derived from a model calibration under standard conditions.

| **Parameter varied** | **fDEOM** | **fREOM** | **fHEOM** | **fDEOM/ fREOM** | **fDEOM/ fHEOM** | **fREOM/ fHEOM** | **KDEOM (y-1)** | **KREOM (y-1)** | **SOC (after 100 y)** | **SOC- EQ** | **C seq (t C ha y-1)** | **SI** |
| --- | --- | --- | --- | --- | --- | --- | --- | --- | --- | --- | --- | --- |
| **fDEOM/fREOM** | 0.01 | 0.39 | 0.61 | 0.01 | 0.01 | 0.63 | 43 | 0.35 | 71.55 | 34.55 | 0.346 | -586 |
| 0.01 | 0.38 | 0.61 | 0.03 | 0.02 | 0.62 | 43 | 0.35 | 71.54 | 34.54 | 0.345 | -631 |
| **0.02** | **0.37** | **0.61** | **0.06** | **0.04** | **0.61** | **43** | **0.35** | **71.51** | **34.51** | **0.345** |  |
| 0.09 | 0.30 | 0.61 | 0.30 | 0.15 | 0.49 | 43 | 0.35 | 71.29 | 34.29 | 0.343 | -638 |
| 0.19 | 0.20 | 0.61 | 0.95 | 0.31 | 0.33 | 43 | 0.35 | 70.98 | 33.99 | 0.340 | -975 |
| 0.29 | 0.10 | 0.61 | 2.90 | 0.48 | 0.16 | 43 | 0.35 | 70.68 | 33.68 | 0.337 | -1959 |
| 0.34 | 0.05 | 0.61 | 6.80 | 0.56 | 0.08 | 43 | 0.35 | 70.52 | 33.52 | 0.335 | -3922 |
| **fDEOM/fHEOM** | 0.53 | 0.37 | 0.10 | 1.43 | 5.30 | 3.70 | 43 | 0.35 | 47.77 | 10.77 | 0.108 | -209 |
| 0.43 | 0.37 | 0.20 | 1.16 | 2.15 | 1.85 | 43 | 0.35 | 52.43 | 15.43 | 0.154 | -104 |
| 0.33 | 0.37 | 0.30 | 0.89 | 1.10 | 1.23 | 43 | 0.35 | 57.08 | 20.08 | 0.201 | -69 |
| 0.23 | 0.37 | 0.40 | 0.62 | 0.58 | 0.93 | 43 | 0.35 | 61.73 | 24.73 | 0.247 | -52 |
| 0.13 | 0.37 | 0.50 | 0.35 | 0.26 | 0.74 | 43 | 0.35 | 66.39 | 29.39 | 0.294 | -41 |
| **0.02** | **0.37** | **0.61** | **0.06** | **0.04** | **0.61** | **43** | **0.35** | **71.51** | **34.51** | **0.345** |  |
| 0.01 | 0.37 | 0.62 | 0.03 | 0.02 | 0.60 | 43 | 0.35 | 71.97 | 34.97 | 0.350 | -42 |
| **fREOM/fHEOM** | 0.02 | 0.88 | 0.10 | 0.02 | 0.20 | 8.80 | 43 | 0.35 | 49.34 | 12.34 | 0.123 | -20.9 |
| 0.02 | 0.78 | 0.20 | 0.03 | 0.10 | 3.90 | 43 | 0.35 | 53.69 | 16.69 | 0.167 | -10.5 |
| 0.02 | 0.68 | 0.30 | 0.03 | 0.07 | 2.27 | 43 | 0.35 | 58.03 | 21.03 | 0.210 | -7.0 |
| 0.02 | 0.58 | 0.40 | 0.03 | 0.05 | 1.45 | 43 | 0.35 | 62.38 | 25.38 | 0.254 | -5.2 |
| 0.02 | 0.48 | 0.50 | 0.04 | 0.04 | 0.96 | 43 | 0.35 | 66.73 | 29.73 | 0.297 | -4.2 |
| **0.02** | **0.37** | **0.61** | **0.06** | **0.04** | **0.61** | **43** | **0.35** | **71.51** | **34.51** | **0.345** |  |
| 0.02 | 0.28 | 0.70 | 0.07 | 0.03 | 0.40 | 43 | 0.35 | 75.42 | 38.42 | 0.384 | -3.0 |
| 0.02 | 0.18 | 0.80 | 0.11 | 0.03 | 0.23 | 43 | 0.35 | 79.77 | 42.77 | 0.428 | -2.6 |
| **KREOM** | 0.02 | 0.37 | 0.61 | 0.06 | 0.04 | 0.61 | 43 | 0.15 | 73.16 | 36.16 | 0.362 | -12 |
| 0.02 | 0.37 | 0.61 | 0.06 | 0.04 | 0.61 | 43 | 0.20 | 72.44 | 35.44 | 0.354 | -33 |
| 0.02 | 0.37 | 0.61 | 0.06 | 0.04 | 0.61 | 43 | 0.25 | 72.00 | 35.00 | 0.350 | -40 |
| 0.02 | 0.37 | 0.61 | 0.06 | 0.04 | 0.61 | 43 | 0.30 | 71.71 | 34.72 | 0.347 | -47 |
| **0.02** | **0.37** | **0.61** | **0.06** | **0.04** | **0.61** | **43** | **0.35** | **71.51** | **34.51** | **0.345** |  |
| 0.02 | 0.37 | 0.61 | 0.06 | 0.04 | 0.61 | 43 | 0.40 | 71.35 | 34.35 | 0.344 | -70 |
| 0.02 | 0.37 | 0.61 | 0.06 | 0.04 | 0.61 | 43 | 0.50 | 71.14 | 34.14 | 0.341 | -85 |
| 0.02 | 0.37 | 0.61 | 0.06 | 0.04 | 0.61 | 43 | 0.75 | 70.85 | 33.85 | 0.338 | -126 |
| 0.02 | 0.37 | 0.61 | 0.06 | 0.04 | 0.61 | 43 | 1.00 | 70.70 | 33.70 | 0.337 | -167 |
| 0.02 | 0.37 | 0.61 | 0.06 | 0.04 | 0.61 | 43 | 1.25 | 70.62 | 33.62 | 0.336 | -209 |
| 0.02 | 0.37 | 0.61 | 0.06 | 0.04 | 0.61 | 43 | 1.50 | 70.56 | 33.56 | 0.336 | -251 |
| 0.02 | 0.37 | 0.61 | 0.06 | 0.04 | 0.61 | 43 | 2.00 | 70.49 | 33.49 | 0.335 | -336 |
| 0.02 | 0.37 | 0.61 | 0.06 | 0.04 | 0.61 | 43 | 3.00 | 70.43 | 33.43 | 0.334 | -507 |

**Table S2**. RothC EOM pool parameters sensitivity analysis for household waste compost amended soil

EOM: exogenous organic matter; f: partitioning factor; K: decomposition constant; DEOM: decomposable EOM; REOM: resistant EOM; HEOM: humified EOM; EQ: SOC at equilibrium = 36.9996 t ha-1; SOC - EQ: SOC after 100 years - SOC at equilibrium; C seq: C sequestration potential; SI (sensitivity index): % change in output variable / % change in input variable

Simulation scenario: 100 years of EOM addition at 1 t C ha-1 y-1.

Values in bold refer to simulation performed with initial values of the parameters derived from a model calibration under standard conditions.
